# Supplementary material for: Deep-Learning-Based Mixture Identification for Nuclear Magnetic Resonance Spectroscopy Applied to Plant Flavors
Source: MDPI journal article supplement (doi:10.3390/molecules28217380), 2023-11-01
Supplement: s1 [file s1]

## Article

# Deep Learning-based Mixture Identification for Nuclear Magnetic Resonance Spectroscopy Applied to Plant Flavors

Yufei Wang<sup>1</sup>, Weiwei Wei<sup>2</sup>, Wen Du<sup>2</sup>, Jiaxiao Cai<sup>2</sup>, Yuxuan Liao<sup>1</sup>, Hongmei Lu<sup>1</sup>, Bo Kong<sup>2,\*</sup> and Zhimin Zhang<sup>1,\*</sup>

<sup>1</sup> College of Chemistry and Chemical Engineering, Central South University, Changsha 410083, China  
222311036@csu.edu.cn (Y.W.); 212311021@csu.edu.cn (Y.L.); hongmeilu@csu.edu.cn (H.L.)

<sup>2</sup> Technology Center, China Tobacco Hunan Industrial Co., LTD, Changsha 410014, China  
weiww0216@hngytobacco.com (W.W.); duw0621@hngytobacco.com (W.D.); jassix@foxmail.com (J.C.)

\* Correspondence: zmzhang@csu.edu.cn (Z.Z.); kongb0706@hngytobacco.com (B.K.)

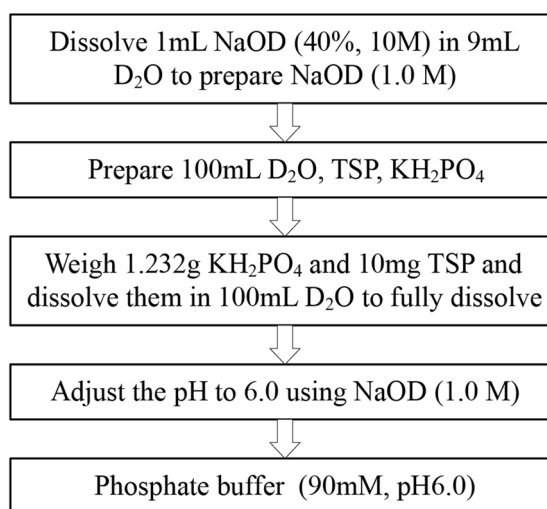

**Figure S1.** The preparation method of phosphate buffer

**Table S1.** The information of the known formulated flavors.

| Formulated flavors | Formulation                  | Ratio |
|--------------------|------------------------------|-------|
| B1                 | Hops Extraction              | 0.5   |
|                    | Fig Extraction               | 0.5   |
| B2                 | Chamomile Extraction-A       | 0.5   |
|                    | Fig Extraction               | 0.5   |
| C1                 | Roman Chamomile Extraction-A | 0.33  |
|                    | Tobacco Maillard Reactants   | 0.33  |
|                    | Valerian Root Extraction     | 0.33  |
| C2                 | Carob Extraction             | 0.33  |
|                    | Raisin Extraction            | 0.33  |
|                    | Valerian Root Extraction     | 0.33  |
| C2-300             | Carob Extraction             | 0.33  |
|                    | Raisin Extraction            | 0.33  |
|                    | Valerian Root Extraction     | 0.33  |
| C2-20%             | Carob Extraction             | 0.26  |
|                    | Raisin Extraction            | 0.26  |
|                    | Valerian Root Extraction     | 0.26  |
|                    | Propylene Glycol             | 0.2   |
| C2-40%             | Carob Extraction             | 0.2   |
|                    | Raisin Extraction            | 0.2   |
|                    | Valerian Root Extraction     | 0.2   |
|                    | Propylene Glycol             | 0.4   |
| C2-60%             | Carob Extraction             | 0.13  |
|                    | Raisin Extraction            | 0.13  |
|                    | Valerian Root Extraction     | 0.13  |
|                    | Propylene Glycol             | 0.6   |
| C2-80%             | Carob Extraction             | 0.06  |
|                    | Raisin Extraction            | 0.06  |
|                    | Valerian Root Extraction     | 0.06  |
|                    | Propylene Glycol             | 0.8   |

Table S1. Cont.

| Formulated flavors | Formulation                  | Ratio |
|--------------------|------------------------------|-------|
| C3                 | Alfalfa Extraction           | 0.33  |
|                    | Plum Extraction              | 0.33  |
|                    | Chicory Extraction           | 0.33  |
| D1                 | Raisin Extraction            | 0.25  |
|                    | Alfalfa Extraction           | 0.25  |
|                    | Fig Extraction               | 0.25  |
|                    | Hops Extraction              | 0.25  |
| D1-400             | Raisin Extraction            | 0.25  |
|                    | Alfalfa Extraction           | 0.25  |
|                    | Fig Extraction               | 0.25  |
|                    | Hops Extraction              | 0.25  |
| D2                 | Tobacco Maillard Reactants   | 0.25  |
|                    | Carob Extraction             | 0.25  |
|                    | Valerian Root Extraction     | 0.25  |
|                    | Plum Extraction              | 0.25  |
| E1                 | Carob Extraction             | 0.2   |
|                    | Chicory Extraction           | 0.2   |
|                    | Alfalfa Extraction           | 0.2   |
|                    | Plum Extraction              | 0.2   |
|                    | Roman Chamomile Extraction-A | 0.2   |
| E1-50%             | Carob Extraction             | 0.1   |
|                    | Chicory Extraction           | 0.1   |
|                    | Alfalfa Extraction           | 0.1   |
|                    | Plum Extraction              | 0.1   |
|                    | Roman Chamomile Extraction-A | 0.1   |
|                    | Propylene Glycol             | 0.5   |
| E1-75%             | Carob Extraction             | 0.05  |
|                    | Chicory Extraction           | 0.05  |
|                    | Alfalfa Extraction           | 0.05  |
|                    | Plum Extraction              | 0.05  |
|                    | Roman Chamomile Extraction-A | 0.05  |
|                    | Propylene Glycol             | 0.75  |

**Table S2.** The detailed results of the known formulated flavors dataset.

| No.    | Formulation                                                                            | Prediction results                                                                     | ACC(%) | TPR(%) | FPR(%) |
|--------|----------------------------------------------------------------------------------------|----------------------------------------------------------------------------------------|--------|--------|--------|
| B1     | Hops Extraction<br>Fig Extraction                                                      | Hops Extraction                                                                        | 92.31  | 50.00  | 0.00   |
| B2     | Chamomile Extraction-A<br>Fig Extraction                                               | Chamomile Extraction-A<br>Fig Extraction                                               | 100.0  | 100.0  | 0.00   |
| C1     | Roman Chamomile Extraction-A<br>Tobacco Maillard Reactants<br>Valerian Root Extraction | Roman Chamomile Extraction-A<br>Tobacco Maillard Reactants<br>Valerian Root Extraction | 100.0  | 100.0  | 0.00   |
| C2     | Carob Extraction<br>Raisin Extraction<br>Valerian Root Extraction                      | Carob Extraction<br>Raisin Extraction<br>Valerian Root Extraction                      | 100.0  | 100.0  | 0.00   |
| C2-300 | Carob Extraction<br>Raisin Extraction<br>Valerian Root Extraction                      | Carob Extraction<br>Raisin Extraction<br>Valerian Root Extraction                      | 100.0  | 100.0  | 0.00   |
| C2-20% | Carob Extraction<br>Raisin Extraction<br>Valerian Root Extraction                      | Carob Extraction<br>Raisin Extraction<br>Valerian Root Extraction                      | 100.0  | 100.0  | 0.00   |
| C2-40% | Carob Extraction<br>Raisin Extraction<br>Valerian Root Extraction                      | Carob Extraction<br>Raisin Extraction<br>Valerian Root Extraction                      | 100.0  | 100.0  | 0.00   |
| C2-60% | Carob Extraction<br>Raisin Extraction<br>Valerian Root Extraction                      | Carob Extraction<br>Raisin Extraction<br>Valerian Root Extraction                      | 100.0  | 100.0  | 0.00   |
| C2-80% | Carob Extraction<br>Raisin Extraction<br>Valerian Root Extraction                      | Carob Extraction<br>Raisin Extraction<br>Valerian Root Extraction                      | 100.0  | 100.0  | 0.00   |
| C3     | Alfalfa Extraction<br>Plum Extraction<br>Chicory Extraction                            | Alfalfa Extraction<br>Plum Extraction<br>Chicory Extraction                            | 100.0  | 100.0  | 0.00   |
| D1     | Raisin Extraction<br>Alfalfa Extraction<br>Fig Extraction<br>Hops Extraction           | Raisin Extraction<br>Fig Extraction<br>Hops Extraction                                 | 92.31  | 75.00  | 0.00   |

Table S2. Cont.

| No.    | Formulation                                                                                                     | Prediction results                                                                                              | ACC(%) | TPR(%) | FPR(%) |
|--------|-----------------------------------------------------------------------------------------------------------------|-----------------------------------------------------------------------------------------------------------------|--------|--------|--------|
| D1-400 | Raisin Extraction<br>Alfalfa Extraction<br>Fig Extraction<br>Hops Extraction                                    | Raisin Extraction<br>Alfalfa Extraction<br>Fig Extraction<br>Hops Extraction                                    | 100.0  | 100.0  | 0.00   |
| D2     | Tobacco Maillard Reactants<br>Carob Extraction<br>Valerian Root Extraction<br>Plum Extraction                   | Tobacco Maillard Reactants<br>Carob Extraction<br>Valerian Root Extraction<br>Plum Extraction                   | 100.0  | 100.0  | 0.00   |
| E1     | Carob Extraction<br>Chicory Extraction<br>Alfalfa Extraction<br>Plum Extraction<br>Roman Chamomile Extraction-A | Carob Extraction<br>Chicory Extraction<br>Alfalfa Extraction<br>Plum Extraction<br>Roman Chamomile Extraction-A | 100.0  | 100.0  | 0.00   |
| E1-50% | Carob Extraction<br>Chicory Extraction<br>Alfalfa Extraction<br>Plum Extraction<br>Roman Chamomile Extraction-A | Carob Extraction<br>Chicory Extraction<br>Alfalfa Extraction<br>Plum Extraction<br>Roman Chamomile Extraction-A | 100.0  | 100.0  | 0.00   |
| E1-75% | Carob Extraction<br>Chicory Extraction<br>Alfalfa Extraction<br>Plum Extraction<br>Roman Chamomile Extraction-A | Carob Extraction<br>Plum Extraction<br>Roman Chamomile Extraction-A<br>Raisin Extraction                        | 76.92  | 60.00  | 12.50  |

**Table S3.** The information of the unknown formulated flavors.

| Formulated flavors | Formulation*       | Ratio |
|--------------------|--------------------|-------|
| L1                 | Hops Extraction    | 0.2   |
|                    | Raisin Extraction  | 0.2   |
|                    | Alfalfa Extraction | 0.2   |
|                    | Fig Extraction     | 0.2   |
|                    | Plum Extraction    | 0.2   |
| L2                 | Hops Extraction    | 0.1   |
|                    | Raisin Extraction  | 0.1   |
|                    | Alfalfa Extraction | 0.1   |
|                    | Fig Extraction     | 0.1   |
|                    | Plum Extraction    | 0.1   |
|                    | Propylene Glycol   | 0.5   |

\* This information was not known at the time of our analysis with the model, and we were informed of the corresponding components after submitting the result.

**Table S4.** The detailed results of the unknown formulated flavors dataset.

| No. | Formulation        | Prediction results | ACC(%)  | TPR(%)  | FPR(%) |
|-----|--------------------|--------------------|---------|---------|--------|
| L1  | Hops Extraction    | Hops Extraction    | 100.00% | 100.00% | 0.00%  |
|     | Raisin Extraction  | Raisin Extraction  |         |         |        |
|     | Alfalfa Extraction | Alfalfa Extraction |         |         |        |
|     | Fig Extraction     | Fig Extraction     |         |         |        |
|     | Plum Extraction    | Plum Extraction    |         |         |        |
| L2  | Hops Extraction    | Hops Extraction    | 84.62%  | 60.00%  | 0.00%  |
|     | Raisin Extraction  | Alfalfa Extraction |         |         |        |
|     | Alfalfa Extraction | Plum Extraction    |         |         |        |
|     | Fig Extraction     |                    |         |         |        |
|     | Plum Extraction    |                    |         |         |        |

**Table S5.** The information of the formulated flavors with different qualities.

| Formulated flavors | Formulation              | Ratio | Weight(mg) |
|--------------------|--------------------------|-------|------------|
| C2                 | Carob Extraction         | 0.33  | 66.7       |
|                    | Raisin Extraction        | 0.33  | 66.7       |
|                    | Valerian Root Extraction | 0.33  | 66.7       |
| C2-300             | Carob Extraction         | 0.33  | 100.0      |
|                    | Raisin Extraction        | 0.33  | 100.0      |
|                    | Valerian Root Extraction | 0.33  | 100.0      |
| D1                 | Raisin Extraction        | 0.25  | 50.0       |
|                    | Alfalfa Extraction       | 0.25  | 50.0       |
|                    | Fig Extraction           | 0.25  | 50.0       |
|                    | Hops Extraction          | 0.25  | 50.0       |
| D1-400             | Raisin Extraction        | 0.25  | 100.0      |
|                    | Alfalfa Extraction       | 0.25  | 100.0      |
|                    | Fig Extraction           | 0.25  | 100.0      |
|                    | Hops Extraction          | 0.25  | 100.0      |



**Table S6.** The plant flavors of the database before and after the extension.

| Before extension             | After extension                     |
|------------------------------|-------------------------------------|
| Galbanum Extraction          | Benzoin Ointment                    |
| Carob Extraction             | Peruvian Infusion                   |
| Chicory Extraction           | Tobacco Burley Extraction           |
| Roman Chamomile Extraction-A | Brazil Tobacco Extraction           |
| Roman Chamomile Extraction-B | Maple Maple Extraction              |
| Alfalfa Extraction           | Galbanum Extraction                 |
| Plum Extraction              | Fenugreek Extraction                |
| Hops Extraction              | Jujube Extraction                   |
| Raisin Extraction            | Zimbabwe Tobacco Extraction         |
| Fig Extraction               | Carob Extraction                    |
| Valerian Root Extraction     | Chicory Extraction                  |
| Tobacco Maillard Reactants   | Coffee Extraction                   |
| Yunnan Tobacco Extraction    | Cocoa Extraction                    |
|                              | Labdanum Extraction                 |
|                              | Green Tea Extraction                |
|                              | Roman Chamomile Extraction-A        |
|                              | Roman Chamomile Extraction-B        |
|                              | Virginia Tobacco Extraction         |
|                              | Alfalfa Extraction                  |
|                              | Malt Infusion                       |
|                              | Plum Extraction                     |
|                              | Hops Extraction                     |
|                              | Raisin Extraction                   |
|                              | Seabuckthorn Extraction             |
|                              | Tamarind Extraction                 |
|                              | Aglain Odorate Concrete             |
|                              | Turkish Oriental Tobacco Extraction |
|                              | Tulip Concrete                      |
|                              | Fig Extraction                      |
|                              | Smoked Plum Extraction              |
|                              | Valerian Root Extraction            |
|                              | Tobacco Maillard Reactants          |
|                              | Yunnan Tobacco Extraction           |

**Table S7.** The detailed results of the DeepMID model after extension on the known formulated flavors dataset.

| No.    | Formulation                                                                            | Prediction results                                                                     | ACC(%) | TPR(%) | FPR(%) |
|--------|----------------------------------------------------------------------------------------|----------------------------------------------------------------------------------------|--------|--------|--------|
| B1     | Hops Extraction<br>Fig Extraction                                                      | Hops Extraction<br>Coffee Extraction                                                   | 93.94  | 50.00  | 3.23   |
| B2     | Chamomile Extraction-A<br>Fig Extraction                                               | Chamomile Extraction-A<br>Fig Extraction                                               | 100.0  | 100.0  | 0.00   |
| C1     | Roman Chamomile Extraction-A<br>Tobacco Maillard Reactants<br>Valerian Root Extraction | Roman Chamomile Extraction-A<br>Tobacco Maillard Reactants<br>Valerian Root Extraction | 100.0  | 100.0  | 0.00   |
| C2     | Carob Extraction<br>Raisin Extraction<br>Valerian Root Extraction                      | Carob Extraction<br>Raisin Extraction<br>Valerian Root Extraction<br>Jujube Extraction | 96.97  | 100.0  | 3.33   |
| C2-300 | Carob Extraction<br>Raisin Extraction<br>Valerian Root Extraction                      | Carob Extraction<br>Raisin Extraction<br>Valerian Root Extraction                      | 100.0  | 100.0  | 0.00   |
| C2-20% | Carob Extraction<br>Raisin Extraction<br>Valerian Root Extraction                      | Carob Extraction<br>Raisin Extraction<br>Valerian Root Extraction                      | 100.0  | 100.0  | 0.00   |
| C2-40% | Carob Extraction<br>Raisin Extraction<br>Valerian Root Extraction                      | Carob Extraction<br>Raisin Extraction<br>Valerian Root Extraction                      | 100.0  | 100.0  | 0.00   |
| C2-60% | Carob Extraction<br>Raisin Extraction<br>Valerian Root Extraction                      | Carob Extraction<br>Raisin Extraction<br>Valerian Root Extraction<br>Jujube Extraction | 96.97  | 100.0  | 3.33   |
| C2-80% | Carob Extraction<br>Raisin Extraction<br>Valerian Root Extraction                      | Carob Extraction<br>Raisin Extraction<br>Valerian Root Extraction                      | 100.0  | 100.0  | 0.00   |

Table S7. Cont.

| No.    | Formulation                                                                                                     | Prediction results                                                                                                                                          | ACC(%) | TPR(%) | FPR(%) |
|--------|-----------------------------------------------------------------------------------------------------------------|-------------------------------------------------------------------------------------------------------------------------------------------------------------|--------|--------|--------|
| C3     | Alfalfa Extraction<br>Plum Extraction<br>Chicory Extraction                                                     | Alfalfa Extraction<br>Plum Extraction<br>Chicory Extraction<br>Tamarind Extraction                                                                          | 96.97  | 100.0  | 3.33   |
| D1     | Raisin Extraction<br>Alfalfa Extraction<br>Fig Extraction<br>Hops Extraction                                    | Raisin Extraction<br>Fig Extraction<br>Hops Extraction<br>Coffee Extraction                                                                                 | 93.94  | 75.00  | 3.45   |
| D1-400 | Raisin Extraction<br>Alfalfa Extraction<br>Fig Extraction<br>Hops Extraction                                    | Raisin Extraction<br>Alfalfa Extraction<br>Fig Extraction<br>Hops Extraction<br>Coffee Extraction                                                           | 96.97  | 100.0  | 3.45   |
| D2     | Tobacco Maillard Reactants<br>Carob Extraction<br>Valerian Root Extraction<br>Plum Extraction                   | Tobacco Maillard Reactants<br>Carob Extraction<br>Valerian Root Extraction<br>Plum Extraction<br>Tamarind Extraction                                        | 96.97  | 100.0  | 3.45   |
| E1     | Carob Extraction<br>Chicory Extraction<br>Alfalfa Extraction<br>Plum Extraction<br>Roman Chamomile Extraction-A | Carob Extraction<br>Chicory Extraction<br>Alfalfa Extraction<br>Plum Extraction<br>Roman Chamomile Extraction-A<br>Tamarind Extraction<br>Jujube Extraction | 93.94  | 100.0  | 7.14   |
| E1-50% | Carob Extraction<br>Chicory Extraction<br>Alfalfa Extraction<br>Plum Extraction<br>Roman Chamomile Extraction-A | Carob Extraction<br>Chicory Extraction<br>Alfalfa Extraction<br>Plum Extraction<br>Roman Chamomile Extraction-A<br>Jujube Extraction                        | 96.97  | 100.0  | 3.57   |

Table S7. Cont.

| No.    | Formulation                  | Prediction results           | ACC(%) | TPR(%) | FPR(%) |
|--------|------------------------------|------------------------------|--------|--------|--------|
| E1-75% | Carob Extraction             | Carob Extraction             | 90.91  | 60.00  | 3.57   |
|        | Chicory Extraction           | Plum Extraction              |        |        |        |
|        | Alfalfa Extraction           | Roman Chamomile Extraction-A |        |        |        |
|        | Plum Extraction              | Raisin Extraction            |        |        |        |
|        | Roman Chamomile Extraction-A |                              |        |        |        |

**Table S2.** The detailed results of the DeepMID model without SPP layer on the known formulated flavors dataset.

| No.      | TN   | TP   | FN | FP | ACC(%) | TPR(%) | FPR(%) |
|----------|------|------|----|----|--------|--------|--------|
| Test set | 4936 | 4939 | 61 | 64 | 98.75  | 98.78  | 1.28   |
| B1       | 10   | 1    | 1  | 1  | 100.0  | 100.0  | 0.00   |
| B2       | 11   | 2    | 0  | 0  | 84.62  | 50.00  | 9.09   |
| C1       | 9    | 3    | 0  | 1  | 92.31  | 100.0  | 10.00  |
| C2       | 10   | 2    | 1  | 0  | 92.31  | 66.67  | 0.00   |
| C2-300   | 10   | 2    | 1  | 0  | 92.31  | 66.67  | 0.00   |
| C2-20%   | 10   | 2    | 1  | 0  | 69.23  | 0.00   | 10.00  |
| C2-40%   | 10   | 2    | 1  | 0  | 76.92  | 50.00  | 11.11  |
| C2-60%   | 10   | 1    | 2  | 0  | 92.31  | 75.00  | 0.00   |
| C2-80%   | 10   | 1    | 2  | 0  | 100.0  | 100.0  | 0.00   |
| C3       | 9    | 0    | 3  | 1  | 92.31  | 66.67  | 0.00   |
| D1       | 8    | 2    | 2  | 1  | 92.31  | 66.67  | 0.00   |
| D1-400   | 9    | 3    | 1  | 0  | 84.62  | 33.33  | 0.00   |
| D2       | 9    | 4    | 0  | 0  | 84.62  | 33.33  | 0.00   |
| E1       | 7    | 4    | 1  | 1  | 84.62  | 80.00  | 12.50  |
| E1-50%   | 7    | 2    | 3  | 1  | 69.23  | 40.00  | 12.50  |
| E1-75%   | 7    | 1    | 4  | 1  | 61.54  | 20.00  | 12.50  |

**Table S9.** The information about plant flavors.

| <b>Name</b>                         | <b>Vendor</b>                                                  |
|-------------------------------------|----------------------------------------------------------------|
| Benzoin Ointment                    | Shanghai Qiyuan Flavor & Fragrance Co. Ltd., Shanghai, China   |
| Peruvian Infusion                   | Hunan Zhufeng Technology Co., Ltd. Changde, China              |
| Tobacco Burley Extraction           | Shanghai Qiyuan Flavor & Fragrance Co. Ltd., Shanghai, China   |
| Brazil Tobacco Extraction           | Shanghai Qiyuan Flavor & Fragrance Co. Ltd., Shanghai, China   |
| Maple Extraction                    | Hunan Zhufeng Technology Co., Ltd. Changde, China              |
| Galbanum Extraction                 | Guangzhou Huafang Tobacco Flavor Co., Ltd., Guangzhou, China   |
| Fenugreek Extraction                | Hunan Shafu Trading Co., Changsha, China                       |
| Jujube Extraction                   | Guangdong Bosch Flavor & Fragrance Co., Ltd., Guangzhou, China |
| Zimbabwe Tobacco Extraction         | Hunan Shafu Trading Co., Changsha, China                       |
| Carob Extraction                    | Guangzhou Huafang Tobacco Flavor Co., Ltd., Guangzhou, China   |
| Chicory Extraction                  | Guangzhou Huafang Tobacco Flavor Co., Ltd., Guangzhou, China   |
| Coffee Extraction                   | Hangzhou Jiemin Flavor & Fragrance Co., Ltd., Hangzhou, China  |
| Cocoa Extraction                    | Shanghai Qiyuan Flavor & Fragrance Co. Ltd., Shanghai, China   |
| Labdanum Extraction                 | Guangzhou Huafang Tobacco Flavor Co., Ltd., Guangzhou, China   |
| Green Tea Extraction                | Guangzhou Huafang Tobacco Flavor Co., Ltd., Guangzhou, China   |
| Roman Chamomile Extraction-A        | Guangzhou Huafang Tobacco Flavor Co., Ltd., Guangzhou, China   |
| Roman Chamomile Extraction-B        | Zhuhai Guanglong Flavor Co., Ltd., Zhuhai, China               |
| Virginia Tobacco Extraction         | Shanghai Qiyuan Flavor & Fragrance Co. Ltd., Shanghai, China   |
| Alfalfa Extraction                  | Guangzhou Huafang Tobacco Flavor Co., Ltd., Guangzhou, China   |
| Malt Infusion                       | Hunan Zhufeng Technology Co., Ltd. Changde, China              |
| Plum Extraction                     | Guangzhou Huafang Tobacco Flavor Co., Ltd., Guangzhou, China   |
| Hops Extraction                     | Guangzhou Huafang Tobacco Flavor Co., Ltd., Guangzhou, China   |
| Raisin Extraction                   | Guangzhou Huafang Tobacco Flavor Co., Ltd., Guangzhou, China   |
| Seabuckthorn Extraction             | Guangdong Bosch Flavor & Fragrance Co., Ltd., Guangzhou, China |
| Tamarind Extraction                 | Hangzhou Jiemin Flavor & Fragrance Co., Ltd., Hangzhou, China  |
| Aglain Odorate Concrete             | Hunan Jiali Flavor Co., Ltd., Yiyang, China                    |
| Turkish Oriental Tobacco Extraction | Guangzhou Huafang Tobacco Flavor Co., Ltd., Guangzhou, China   |
| Tulip Concrete                      | Shanghai Qiyuan Flavor & Fragrance Co. Ltd., Shanghai, China   |
| Fig Extraction                      | Guangzhou Huafang Tobacco Flavor Co., Ltd., Guangzhou, China   |
| Smoked Plum Extraction              | Shanghai Qiyuan Flavor & Fragrance Co. Ltd., Shanghai, China   |
| Valerian Root Extraction            | Guangzhou Huafang Tobacco Flavor Co., Ltd., Guangzhou, China   |
| Tobacco Maillard Reactants          | Guangzhou Huafang Tobacco Flavor Co., Ltd., Guangzhou, China   |
| Yunnan Tobacco Extraction           | Guangzhou Huafang Tobacco Flavor Co., Ltd., Guangzhou, China   |

**Table S10.** Detailed information of the reagents.

| Reagents                        | Purity                             | Manufacturers                                               |
|---------------------------------|------------------------------------|-------------------------------------------------------------|
| KH <sub>2</sub> PO <sub>4</sub> | ACS reagent, ≥99.0%                | Sigma-Aldrich (Shanghai) Trading Co.Ltd., Shanghai, China   |
| TSP                             | 99 atm% D                          | Sigma-Aldrich (Shanghai) Trading Co.Ltd., Shanghai, China   |
| NaOD                            | 40wt.%in D <sub>2</sub> O, 99atm%D | Sigma-Aldrich (Shanghai) Trading Co.Ltd., Shanghai, China   |
| DMSO-d <sub>6</sub>             | 99.8 atm% D,                       | Ningbo Cuiying Chemical Technology Co., Ltd., Ningbo, China |
| D <sub>2</sub> O                | 99.9 atm % D                       | Ningbo Cuiying Chemical Technology Co., Ltd., Ningbo, China |
| CD <sub>3</sub> OD              | ≥99.8 atm % D                      | Ningbo Cuiying Chemical Technology Co., Ltd., Ningbo, China |
